# Supplementary material for: Solvation chemical shifts of perylenic antenna molecules from molecular dynamics simulations
Source: Royal Society of Chemistry journal article supplement (doi:10.1039/c4cp02894e), 2014-01-01
Supplement: c4cp02894e1.pdf [file c4cp02894e1.pdf]

**Supporting Information:**

**Solvation chemical shifts of perylenic antenna  
molecules from molecular dynamics simulations**

Nergiz Özcan<sup>\*,†</sup>, Jiří Mareš,<sup>‡</sup> Dage Sundholm,<sup>†</sup> and Juha Vaara<sup>\*,‡</sup>

*Department of Chemistry, P.O. Box 50, FIN-00014 University of Helsinki, Finland, and NMR  
Research Group, Department of Physics, P.O. Box 3000, FIN-90014 University of Oulu, Finland*

E-mail: nergiz.ozcan@helsinki.fi;juha.vaara@iki.fi

---

\*To whom correspondence should be addressed

<sup>†</sup>Department of Chemistry, P.O. Box 50, FIN-00014 University of Helsinki, Finland

<sup>‡</sup>NMR Research Group, Department of Physics, P.O. Box 3000, FIN-90014 University of Oulu, Finland

# Contents

## List of Tables

|   |                                                                                                                                                                                                  |    |
|---|--------------------------------------------------------------------------------------------------------------------------------------------------------------------------------------------------|----|
| 1 | Calculated (B3LYP/def2-SVP) $^{13}\text{C}$ chemical shift (ppm) for model H. Results for equivalent nuclei are given in groups. The numbering of groups and nuclei refers to Figure 10. . . . . | 4  |
| 2 | Calculated (B3LYP/def2-SVP) $^{13}\text{C}$ chemical shift (ppm) for model G. Results for equivalent nuclei are given in groups. The numbering of groups and nuclei refers to Figure 10. . . . . | 5  |
| 3 | Calculated (B3LYP/def2-SVP) $^{13}\text{C}$ chemical shift (ppm) for model F. Results for equivalent nuclei are given in groups. The numbering of groups and nuclei refers to Figure 10. . . . . | 6  |
| 4 | Calculated (B3LYP/def2-SVP) $^{13}\text{C}$ chemical shift (ppm) for model E. Results for equivalent nuclei are given in groups. The numbering of groups and nuclei refers to Figure 11. . . . . | 7  |
| 5 | Calculated (B3LYP/def2-SVP) $^{13}\text{C}$ chemical shift (ppm) for model D. Results for equivalent nuclei are given in groups. The numbering of groups and nuclei refers to Figure 11. . . . . | 8  |
| 6 | Calculated (B3LYP/def2-SVP) $^{13}\text{C}$ chemical shift (ppm) for model C. Results for equivalent nuclei are given in groups. The numbering of groups and nuclei refers to Figure 11. . . . . | 9  |
| 7 | Calculated (B3LYP/def2-SVP) $^{13}\text{C}$ chemical shift (ppm) for model B. Results for equivalent nuclei are given in groups. The numbering of groups and nuclei refers to Figure 12. . . . . | 10 |

|    |                                                                                                                                                                                                                                                                                                                                                                            |    |
|----|----------------------------------------------------------------------------------------------------------------------------------------------------------------------------------------------------------------------------------------------------------------------------------------------------------------------------------------------------------------------------|----|
| 8  | Calculated (B3LYP/def2-SVP) $^{13}\text{C}$ chemical shift (ppm) for model A. Results for equivalent nuclei are given in groups. The numbering of groups and nuclei refers to Figure 12. . . . .                                                                                                                                                                           | 11 |
| 9  | Calculated (def2-SVP) $^{13}\text{C}$ chemical shifts (ppm) for perylene with different methods in the <i>in vacuo</i> model. Results are given for groups of equivalent nuclei. The reference ( $\text{CH}_4$ ) shielding constants are (in ppm): $\sigma_{\text{ref}} = 201.32, 198.39, 195.62$ and $193.03$ , with HF, BHandHLYP, B3LYP and BLYP, respectively. . . . . | 12 |
| 10 | Calculated $^{13}\text{C}$ chemical shift (ppm) for model B with different basis sets and shell thicknesses at the B3LYP level. Results for equivalent nuclei are given in groups. $\sigma_{\text{ref}} = 195.62$ and $190.30$ ppm with def2-SVP and def2-TZVP, respectively. . . . .                                                                                      | 13 |
| 11 | Calculated first four and five singlet excited state energies in each of the relevant irreps of perylene up to $-e(\text{HOMO})$ $5.11$ eV and acetonitrile <i>in vacuo</i> . The magnetically allowed excited states and corresponding irreps at which the magnetic transition dipole moment operates in, are given. . . . .                                              | 14 |
| 12 | The calculated singlet excited state energies up to $-e(\text{HOMO})$ values $5.51, 5.67$ and $5.43$ eV of perylene. The perylene molecule was dissolved in acetonitrile in the MD snapshot numbers 103, 457 and 735. . . . .                                                                                                                                              | 15 |
| 13 | XYZ coordinates of the perylene snapshots 103, 457 and 735. . . . .                                                                                                                                                                                                                                                                                                        | 16 |

Table S1: Calculated (B3LYP/def2-SVP)  $^{13}\text{C}$  chemical shift (ppm) for model H. Results for equivalent nuclei are given in groups. The numbering of groups and nuclei refers to Figure 10.

| Group/Nucleus | $\delta_{in\ vacuo}^a$ | $\delta_{sol}^b$ | $\delta_a^c$ | $\delta_{sol} - \delta_a^d$ | $\delta_{sol} - \delta_{in\ vacuo}^e$ |
|---------------|------------------------|------------------|--------------|-----------------------------|---------------------------------------|
| C3            | 131.74                 | 125.66           | -0.89        | 126.55                      | -6.08                                 |
| C8            | 132.79                 | 127.28           | -0.86        | 128.14                      | -5.51                                 |
| C14           | 138.24                 | 132.75           | -0.89        | 133.64                      | -5.49                                 |
| C4            | 138.21                 | 133.24           | -0.93        | 134.17                      | -4.97                                 |
| G3            | 142.80                 | 139.63           | -0.90        | 140.54                      | -3.17                                 |
| G5            | 134.89                 | 132.00           | -0.89        | 132.88                      | -2.89                                 |
| G2            | 122.25                 | 124.33           | -0.95        | 125.28                      | 2.09                                  |
| G9            | 161.34                 | 164.28           | -0.95        | 165.23                      | 2.94                                  |
| G7            | 128.81                 | 134.27           | -0.98        | 135.25                      | 5.47                                  |
| G8            | 134.17                 | 139.69           | -0.95        | 140.64                      | 5.51                                  |
| G4            | 136.20                 | 141.80           | -1.00        | 142.80                      | 5.60                                  |
| G1            | 122.19                 | 128.55           | -1.00        | 129.54                      | 6.35                                  |
| G6            | 126.93                 | 133.74           | -0.96        | 134.70                      | 6.80                                  |

<sup>a</sup> *In vacuo* result.

<sup>b</sup> Dynamically solvated model.

<sup>c</sup> A posteriori extracted solvent magnetisability anisotropy correction.

<sup>d</sup> Approximate electrostatic contribution,  $\delta_E$ .

<sup>e</sup> Total solvation-induced change.

Table S2: Calculated (B3LYP/def2-SVP)  $^{13}\text{C}$  chemical shift (ppm) for model G. Results for equivalent nuclei are given in groups. The numbering of groups and nuclei refers to Figure 10.

| Group/Nucleus <sup>a</sup> | $\delta_{in\ vacuo}^b$ | $\delta_{sol}^c$ | $\delta_a^d$ | $\delta_{sol} - \delta_a^e$ | $\delta_{sol} - \delta_{in\ vacuo}^f$ |
|----------------------------|------------------------|------------------|--------------|-----------------------------|---------------------------------------|
| C11                        | 131.11                 | 125.50           | -0.94        | 126.44                      | -5.60                                 |
| C6                         | 134.44                 | 129.00           | -0.90        | 129.90                      | -5.44                                 |
| C14                        | 138.29                 | 133.65           | -0.97        | 134.62                      | -4.64                                 |
| C13                        | 135.46                 | 132.23           | -0.93        | 133.16                      | -3.23                                 |
| C10                        | 143.02                 | 139.98           | -0.95        | 140.93                      | -3.04                                 |
| C12                        | 143.03                 | 140.45           | -0.95        | 141.40                      | -2.57                                 |
| C7                         | 128.37                 | 128.13           | -0.94        | 129.07                      | -0.24                                 |
| C5                         | 132.92                 | 132.82           | -0.91        | 133.73                      | -0.09                                 |
| C4                         | 156.18                 | 157.57           | -0.92        | 158.48                      | 1.39                                  |
| G3                         | 121.12                 | 123.55           | -0.99        | 124.54                      | 2.43                                  |
| G2                         | 161.49                 | 164.41           | -0.99        | 165.40                      | 2.92                                  |
| G1                         | 48.06                  | 51.82            | -1.04        | 52.86                       | 3.76                                  |
| C24                        | 130.35                 | 134.75           | -0.97        | 135.73                      | 4.40                                  |
| C19                        | 135.94                 | 140.94           | -1.04        | 141.98                      | 5.00                                  |
| C18                        | 121.59                 | 127.01           | -1.03        | 128.05                      | 5.42                                  |
| C16                        | 136.19                 | 141.94           | -1.05        | 142.98                      | 5.74                                  |
| C17                        | 120.41                 | 127.16           | -1.04        | 128.20                      | 6.75                                  |
| C26                        | 127.19                 | 134.00           | -1.00        | 135.00                      | 6.81                                  |
| C25                        | 127.14                 | 134.39           | -1.02        | 135.41                      | 7.25                                  |
| C8                         | 127.91                 | 135.65           | -1.02        | 136.67                      | 7.74                                  |
| C9                         | 118.45                 | 137.80           | -1.00        | 138.80                      | 19.35                                 |

<sup>a</sup> The practically chemically equivalent nuclei that are averaged over, are C21-C23.

<sup>b</sup> *In vacuo* result.

<sup>c</sup> Dynamically solvated model.

<sup>d</sup> A posteriori extracted solvent magnetisability anisotropy correction.

<sup>e</sup> Approximate electrostatic contribution,  $\delta_E$ .

<sup>f</sup> Total solvation-induced change.

Table S3: Calculated (B3LYP/def2-SVP)  $^{13}\text{C}$  chemical shift (ppm) for model F. Results for equivalent nuclei are given in groups. The numbering of groups and nuclei refers to Figure 10.

| Group/Nucleus <sup>a</sup> | $\delta_{in\ vacuo}^b$ | $\delta_{sol}^c$ | $\delta_a^d$ | $\delta_{sol} - \delta_a^e$ | $\delta_{sol} - \delta_{in\ vacuo}^f$ |
|----------------------------|------------------------|------------------|--------------|-----------------------------|---------------------------------------|
| C21                        | 131.32                 | 125.20           | -0.95        | 126.15                      | -6.12                                 |
| C16                        | 134.87                 | 130.05           | -0.92        | 130.97                      | -4.82                                 |
| C24                        | 138.07                 | 133.36           | -0.97        | 134.34                      | -4.70                                 |
| C22                        | 142.94                 | 139.09           | -0.97        | 140.05                      | -3.85                                 |
| C20                        | 142.57                 | 138.95           | -0.98        | 139.93                      | -3.61                                 |
| C14                        | 152.29                 | 149.35           | -0.88        | 150.23                      | -2.94                                 |
| C23                        | 135.32                 | 132.79           | -0.96        | 133.75                      | -2.53                                 |
| C15                        | 135.83                 | 133.33           | -0.90        | 134.22                      | -2.51                                 |
| G1                         | 151.83                 | 149.64           | -0.87        | 150.51                      | -2.19                                 |
| C17                        | 131.36                 | 130.62           | -0.96        | 131.59                      | -0.73                                 |
| G4                         | 126.60                 | 128.32           | -0.95        | 129.27                      | 1.72                                  |
| C34                        | 131.95                 | 133.95           | -0.96        | 134.91                      | 2.00                                  |
| G6                         | 121.53                 | 123.76           | -0.99        | 124.75                      | 2.23                                  |
| G2                         | 124.89                 | 127.13           | -1.00        | 128.13                      | 2.24                                  |
| G5                         | 161.40                 | 164.44           | -0.98        | 165.41                      | 3.04                                  |
| G3                         | 131.21                 | 134.68           | -1.00        | 135.68                      | 3.47                                  |
| C26                        | 136.12                 | 141.11           | -1.06        | 142.17                      | 4.99                                  |
| C36                        | 126.99                 | 132.87           | -1.04        | 133.91                      | 5.88                                  |
| C35                        | 127.91                 | 134.35           | -1.05        | 135.41                      | 6.44                                  |
| C29                        | 135.96                 | 142.73           | -1.06        | 143.79                      | 6.77                                  |
| C28                        | 121.83                 | 128.85           | -1.06        | 129.91                      | 7.02                                  |
| C18                        | 127.46                 | 134.54           | -1.04        | 135.58                      | 7.08                                  |
| C27                        | 121.40                 | 128.70           | -1.07        | 129.77                      | 7.29                                  |
| C19                        | 130.73                 | 141.26           | -0.98        | 142.25                      | 10.54                                 |

<sup>a</sup> The practically chemically equivalent nuclei that are averaged over, are C30-C25 and C31-C33.

<sup>b</sup> *In vacuo* result.

<sup>c</sup> Dynamically solvated model.

<sup>d</sup> A posteriori extracted solvent magnetisability anisotropy correction.

<sup>e</sup> Approximate electrostatic contribution,  $\delta_E$ .

<sup>f</sup> Total solvation-induced change.

Table S4: Calculated (B3LYP/def2-SVP)  $^{13}\text{C}$  chemical shift (ppm) for model E. Results for equivalent nuclei are given in groups. The numbering of groups and nuclei refers to Figure 11.

| Group/Nucleus | $\delta_{in\ vacuo}^a$ | $\delta_{sol}^b$ | $\delta_a^c$ | $\delta_{sol} - \delta_a^d$ | $\delta_{sol} - \delta_{in\ vacuo}^e$ |
|---------------|------------------------|------------------|--------------|-----------------------------|---------------------------------------|
| C8            | 134.21                 | 127.78           | -0.88        | 128.66                      | -6.43                                 |
| C14           | 135.82                 | 130.82           | -0.92        | 131.75                      | -5.00                                 |
| G1            | 146.83                 | 141.94           | -0.91        | 142.85                      | -4.89                                 |
| G2            | 133.05                 | 128.38           | -0.88        | 129.26                      | -4.67                                 |
| C3            | 134.25                 | 129.71           | -0.91        | 130.62                      | -4.54                                 |
| C4            | 129.92                 | 131.53           | -0.97        | 132.50                      | 1.61                                  |
| G10           | 161.99                 | 164.12           | -0.99        | 165.11                      | 2.13                                  |
| G4            | 120.42                 | 122.72           | -0.98        | 123.70                      | 2.30                                  |
| G3            | 139.12                 | 143.47           | -0.89        | 144.36                      | 4.35                                  |
| G9            | 26.68                  | 31.11            | -1.03        | 32.14                       | 4.43                                  |
| G5            | 127.13                 | 132.76           | -1.00        | 133.75                      | 5.63                                  |
| G6            | 131.72                 | 138.19           | -0.94        | 139.13                      | 6.47                                  |
| G7            | 132.61                 | 141.76           | -0.99        | 142.75                      | 9.14                                  |
| G8            | 131.76                 | 148.08           | -0.96        | 149.03                      | 16.31                                 |

<sup>a</sup> *In vacuo* result.

<sup>b</sup> Dynamically solvated model.

<sup>c</sup> A posteriori extracted solvent magnetisability anisotropy correction.

<sup>d</sup> Approximate electrostatic contribution,  $\delta_E$ .

<sup>e</sup> Total solvation-induced change.

Table S5: Calculated (B3LYP/def2-SVP)  $^{13}\text{C}$  chemical shift (ppm) for model D. Results for equivalent nuclei are given in groups. The numbering of groups and nuclei refers to Figure 11.

| Group/Nucleus | $\delta_{in\ vacuo}^a$ | $\delta_{sol}^b$ | $\delta_a^c$ | $\delta_{sol} - \delta_a^d$ | $\delta_{sol} - \delta_{in\ vacuo}^e$ |
|---------------|------------------------|------------------|--------------|-----------------------------|---------------------------------------|
| G1            | 147.62                 | 141.00           | -0.93        | 141.93                      | -6.62                                 |
| C8            | 133.90                 | 128.32           | -0.89        | 129.22                      | -5.58                                 |
| C14           | 135.54                 | 130.92           | -0.95        | 131.87                      | -4.63                                 |
| G2            | 132.69                 | 128.35           | -0.90        | 129.25                      | -4.34                                 |
| C3            | 133.63                 | 129.78           | -0.93        | 130.72                      | -3.84                                 |
| G3            | 137.24                 | 134.79           | -0.98        | 135.77                      | -2.46                                 |
| G5            | 131.29                 | 132.89           | -1.03        | 133.91                      | 1.60                                  |
| C4            | 130.58                 | 132.38           | -1.00        | 133.38                      | 1.80                                  |
| G9            | 142.13                 | 144.18           | -0.91        | 145.09                      | 2.05                                  |
| G7            | 120.29                 | 122.69           | -1.02        | 123.72                      | 2.40                                  |
| G6            | 161.40                 | 164.34           | -1.05        | 165.38                      | 2.94                                  |
| G10           | 131.22                 | 134.27           | -1.03        | 135.30                      | 3.05                                  |
| G4            | 139.31                 | 143.59           | -0.91        | 144.49                      | 4.28                                  |
| G13           | 127.18                 | 132.51           | -1.04        | 133.55                      | 5.33                                  |
| G12           | 132.90                 | 139.74           | -0.97        | 140.72                      | 6.85                                  |
| G11           | 132.66                 | 142.07           | -1.02        | 143.10                      | 9.41                                  |
| G8            | 137.25                 | 148.77           | -0.99        | 149.76                      | 11.53                                 |

<sup>a</sup> *In vacuo* result.

<sup>b</sup> Dynamically solvated model.

<sup>c</sup> A posteriori extracted solvent magnetisability anisotropy correction.

<sup>d</sup> Approximate electrostatic contribution,  $\delta_E$ .

<sup>e</sup> Total solvation-induced change.



Table S6: Calculated (B3LYP/def2-SVP)  $^{13}\text{C}$  chemical shift (ppm) for model C. Results for equivalent nuclei are given in groups. The numbering of groups and nuclei refers to Figure 11.

| Group/Nucleus <sup>a</sup> | $\delta_{in\ vacuo}^b$ | $\delta_{sol}^c$ | $\delta_a^d$ | $\delta_{sol} - \delta_a^e$ | $\delta_{sol} - \delta_{in\ vacuo}^f$ |
|----------------------------|------------------------|------------------|--------------|-----------------------------|---------------------------------------|
| C11                        | 136.38                 | 131.30           | -0.89        | 132.19                      | -5.08                                 |
| C13                        | 145.47                 | 140.66           | -0.94        | 141.60                      | -4.81                                 |
| C5                         | 133.25                 | 128.52           | -0.94        | 129.46                      | -4.73                                 |
| C10                        | 133.27                 | 129.06           | -0.90        | 129.96                      | -4.21                                 |
| C3                         | 144.28                 | 140.40           | -0.94        | 141.34                      | -3.88                                 |
| C12                        | 127.23                 | 124.90           | -0.91        | 125.80                      | -2.33                                 |
| C19                        | 130.75                 | 130.77           | -0.90        | 131.67                      | 0.02                                  |
| G3                         | 162.05                 | 163.39           | -1.03        | 164.43                      | 1.35                                  |
| C6                         | 130.13                 | 131.62           | -1.00        | 132.61                      | 1.49                                  |
| C15                        | 120.19                 | 122.72           | -1.01        | 123.73                      | 2.53                                  |
| C4                         | 139.54                 | 142.82           | -0.92        | 143.74                      | 3.28                                  |
| C7                         | 118.92                 | 122.56           | -1.02        | 123.58                      | 3.64                                  |
| G2                         | 26.83                  | 31.22            | -1.05        | 32.27                       | 4.38                                  |
| C9                         | 139.24                 | 143.78           | -0.92        | 144.70                      | 4.53                                  |
| G1                         | 48.40                  | 53.19            | -1.03        | 54.22                       | 4.79                                  |
| C20                        | 155.01                 | 160.02           | -0.91        | 160.93                      | 5.01                                  |
| C22                        | 133.35                 | 139.14           | -0.96        | 140.10                      | 5.79                                  |
| C23                        | 129.23                 | 136.03           | -0.97        | 137.01                      | 6.80                                  |
| C24                        | 125.27                 | 132.22           | -1.02        | 133.24                      | 6.95                                  |
| C25                        | 131.57                 | 138.77           | -0.96        | 139.73                      | 7.19                                  |
| C8                         | 132.02                 | 148.37           | -1.00        | 149.37                      | 16.36                                 |
| C14                        | 131.45                 | 148.30           | -0.99        | 149.29                      | 16.86                                 |
| C21                        | 117.28                 | 134.31           | -0.97        | 135.27                      | 17.03                                 |

<sup>a</sup> The practically chemically equivalent nuclei that are averaged over, are C1-C27 and C16-C18.

<sup>b</sup> *In vacuo* result.

<sup>c</sup> Dynamically solvated model.

<sup>d</sup> A posteriori extracted solvent magnetisability anisotropy correction.

<sup>e</sup> Approximate electrostatic contribution,  $\delta_E$ .

<sup>f</sup> Total solvation-induced change.

Table S7: Calculated (B3LYP/def2-SVP)  $^{13}\text{C}$  chemical shift (ppm) for model B. Results for equivalent nuclei are given in groups. The numbering of groups and nuclei refers to Figure 12.

| Group/Nucleus <sup>a</sup> | $\delta_{in\ vacuo}^b$ | $\delta_{sol}^c$ | $\delta_a^d$ | $\delta_{sol} - \delta_a^e$ | $\delta_{sol} - \delta_{in\ vacuo}^f$ |
|----------------------------|------------------------|------------------|--------------|-----------------------------|---------------------------------------|
| C18                        | 149.63                 | 140.87           | -0.97        | 141.84                      | -8.76                                 |
| C16                        | 137.94                 | 131.13           | -0.93        | 132.06                      | -6.81                                 |
| C8                         | 148.86                 | 142.19           | -0.97        | 143.16                      | -6.67                                 |
| G3                         | 140.67                 | 134.18           | -1.01        | 135.19                      | -6.49                                 |
| C15                        | 134.77                 | 128.90           | -0.95        | 129.85                      | -5.87                                 |
| C10                        | 134.87                 | 129.61           | -0.98        | 130.59                      | -5.26                                 |
| G2                         | 140.39                 | 135.18           | -1.02        | 136.20                      | -5.21                                 |
| C24                        | 135.41                 | 130.38           | -0.92        | 131.30                      | -5.03                                 |
| G6                         | 153.79                 | 149.05           | -0.91        | 149.96                      | -4.74                                 |
| C17                        | 131.59                 | 127.83           | -0.94        | 128.77                      | -3.75                                 |
| C25                        | 152.30                 | 150.56           | -0.90        | 151.46                      | -1.74                                 |
| C2                         | 144.42                 | 142.84           | -0.96        | 143.80                      | -1.58                                 |
| G7                         | 129.63                 | 128.32           | -0.98        | 129.30                      | -1.30                                 |
| G5                         | 134.16                 | 133.59           | -1.05        | 134.63                      | -0.57                                 |
| G4                         | 134.07                 | 133.82           | -1.07        | 134.89                      | -0.25                                 |
| C11                        | 132.43                 | 132.21           | -1.04        | 133.25                      | -0.22                                 |
| G9                         | 127.51                 | 127.69           | -1.03        | 128.72                      | 0.17                                  |
| G8                         | 133.98                 | 134.60           | -1.04        | 135.64                      | 0.62                                  |
| C32                        | 143.99                 | 144.91           | -0.95        | 145.87                      | 0.92                                  |
| C12                        | 121.63                 | 122.78           | -1.06        | 123.84                      | 1.15                                  |
| C20                        | 122.16                 | 123.31           | -1.06        | 124.37                      | 1.15                                  |
| C9                         | 140.86                 | 142.28           | -0.95        | 143.24                      | 1.42                                  |
| C28                        | 133.74                 | 136.29           | -1.00        | 137.29                      | 2.55                                  |
| C14                        | 141.11                 | 143.79           | -0.96        | 144.74                      | 2.68                                  |
| G1                         | 161.44                 | 164.16           | -1.08        | 165.24                      | 2.73                                  |
| C29                        | 129.16                 | 132.23           | -1.09        | 133.32                      | 3.07                                  |
| C27                        | 136.89                 | 140.35           | -1.01        | 141.36                      | 3.46                                  |
| C30                        | 135.75                 | 139.96           | -1.03        | 140.99                      | 4.21                                  |
| C26                        | 132.80                 | 138.03           | -1.00        | 139.03                      | 5.24                                  |
| C19                        | 139.73                 | 148.76           | -1.02        | 149.78                      | 9.03                                  |
| C13                        | 140.26                 | 149.37           | -1.04        | 150.41                      | 9.11                                  |

<sup>a</sup> The practically chemically equivalent nuclei that are averaged over, are C1-C3, C21-C23, C33-C37, C4-C5-C6 and C34-C35-C36.

<sup>b</sup> *In vacuo* result.

<sup>c</sup> Dynamically solvated model.

<sup>d</sup> A posteriori extracted solvent magnetisability anisotropy correction.

<sup>e</sup> Approximate electrostatic contribution,  $\delta_E$ .

<sup>f</sup> Total solvation-induced change.

Table S8: Calculated (B3LYP/def2-SVP)  $^{13}\text{C}$  chemical shift (ppm) for model A. Results for equivalent nuclei are given in groups. The numbering of groups and nuclei refers to Figure 12.

| Group/Nucleus <sup>a</sup> | $\delta_{in\ vacuo}^b$ | $\delta_{sol}^c$ | $\delta_a^d$ | $\delta_{sol} - \delta_a^e$ | $\delta_{sol} - \delta_{in\ vacuo}^f$ |
|----------------------------|------------------------|------------------|--------------|-----------------------------|---------------------------------------|
| C16                        | 136.08                 | 130.58           | -0.97        | 131.55                      | -5.50                                 |
| C8                         | 145.46                 | 140.26           | -0.99        | 141.25                      | -5.20                                 |
| C10                        | 132.89                 | 127.76           | -1.02        | 128.78                      | -5.13                                 |
| C18                        | 146.31                 | 141.49           | -1.01        | 142.50                      | -4.82                                 |
| G6                         | 150.00                 | 145.63           | -0.93        | 146.56                      | -4.38                                 |
| C15                        | 132.74                 | 128.87           | -1.01        | 129.87                      | -3.88                                 |
| C24                        | 132.96                 | 129.82           | -0.94        | 130.77                      | -3.13                                 |
| C17                        | 128.89                 | 125.79           | -0.98        | 126.76                      | -3.11                                 |
| G3                         | 136.67                 | 133.80           | -1.06        | 134.85                      | -2.87                                 |
| G2                         | 136.48                 | 133.82           | -1.05        | 134.87                      | -2.66                                 |
| C25                        | 151.57                 | 150.11           | -0.93        | 151.04                      | -1.46                                 |
| C2                         | 143.35                 | 142.30           | -1.00        | 143.30                      | -1.05                                 |
| C32                        | 143.06                 | 142.89           | -1.01        | 143.90                      | -0.17                                 |
| C11                        | 130.91                 | 131.03           | -1.07        | 132.10                      | 0.13                                  |
| G9                         | 150.40                 | 150.75           | -0.92        | 151.68                      | 0.35                                  |
| C14                        | 140.04                 | 140.63           | -1.01        | 141.64                      | 0.59                                  |
| G7                         | 126.60                 | 127.30           | -0.99        | 128.29                      | 0.70                                  |
| G1                         | 161.25                 | 162.07           | -1.10        | 163.17                      | 0.82                                  |
| G13                        | 37.65                  | 38.69            | -0.99        | 39.67                       | 1.04                                  |
| G12                        | 60.66                  | 61.92            | -0.93        | 62.85                       | 1.26                                  |
| G11                        | 37.01                  | 38.38            | -1.00        | 39.38                       | 1.37                                  |
| G4                         | 130.86                 | 132.70           | -1.11        | 133.81                      | 1.84                                  |
| G5                         | 130.91                 | 132.84           | -1.08        | 133.92                      | 1.93                                  |
| C12                        | 119.39                 | 121.45           | -1.08        | 122.53                      | 2.06                                  |
| G8                         | 129.37                 | 132.03           | -1.00        | 133.02                      | 2.66                                  |
| G10                        | 45.41                  | 48.08            | -0.91        | 48.99                       | 2.66                                  |
| C20                        | 120.13                 | 123.03           | -1.09        | 124.12                      | 2.90                                  |
| G14                        | 38.28                  | 41.27            | -0.91        | 42.18                       | 2.99                                  |
| C9                         | 139.69                 | 142.70           | -0.99        | 143.69                      | 3.01                                  |
| C30                        | 133.03                 | 136.28           | -1.08        | 137.36                      | 3.26                                  |
| C28                        | 131.04                 | 136.01           | -1.01        | 137.01                      | 4.96                                  |
| C29                        | 125.67                 | 131.14           | -1.11        | 132.25                      | 5.47                                  |
| C27                        | 134.36                 | 139.99           | -1.03        | 141.01                      | 5.62                                  |
| C26                        | 128.59                 | 137.68           | -1.02        | 138.69                      | 9.09                                  |
| C13                        | 137.99                 | 148.36           | -1.04        | 149.40                      | 10.37                                 |
| C19                        | 137.45                 | 148.16           | -1.06        | 149.22                      | 10.71                                 |

<sup>a</sup> See the footnote *a* in Table S7.

<sup>b</sup> *In vacuo* result.

<sup>c</sup> Dynamically solvated model.

<sup>d</sup> A posteriori extracted solvent magnetisability anisotropy correction.

<sup>e</sup> Approximate electrostatic contribution,  $\delta_E$ .

<sup>f</sup> Total solvation-induced change.

Table S9: Calculated (def2-SVP)  $^{13}\text{C}$  chemical shifts (ppm) for perylene with different methods in the *in vacuo* model. Results are given for groups of equivalent nuclei. The reference ( $\text{CH}_4$ ) shielding constants are (in ppm):  $\sigma_{\text{ref}} = 201.32, 198.39, 195.62$  and  $193.03$ , with HF, BHandHLYP, B3LYP and BLYP, respectively.

| Group <sup>a</sup> | HF     | BHandHLYP | B3LYP  | BLYP   |
|--------------------|--------|-----------|--------|--------|
| G1                 | 138.72 | 140.04    | 138.87 | 137.33 |
| G2                 | 133.30 | 134.66    | 133.45 | 131.90 |
| G3                 | 136.05 | 137.84    | 136.98 | 135.56 |
| G4                 | 130.79 | 131.72    | 130.48 | 128.75 |
| G5                 | 123.63 | 124.20    | 122.74 | 120.86 |
| G6                 | 129.11 | 129.61    | 128.20 | 126.38 |

<sup>a</sup> See Figure 5 of the main article.

Table S 10: Calculated  $^{13}\text{C}$  chemical shift (ppm) for model B with different basis sets and shell thicknesses at the B3LYP level. Results for equivalent nuclei are given in groups.  $\sigma_{\text{ref}} = 195.62$  and 190.30 ppm with def2-SVP and def2-TZVP, respectively.

| Shell thickness<br>Group* | <i>In vacuo</i> |           | 3.5 Å    |           | 5 Å      |
|---------------------------|-----------------|-----------|----------|-----------|----------|
|                           | def2-SVP        | def2-TZVP | def2-SVP | def2-TZVP | def2-SVP |
| G1                        | 140.39          | 148.8     | 138.53   | 150.41    | 138.34   |
| C2                        | 144.42          | 155.53    | 151.36   | 163.01    | 151.10   |
| G3                        | 134.07          | 140.52    | 132.50   | 142.45    | 132.80   |
| C8                        | 148.86          | 156.26    | 148.74   | 160.14    | 148.79   |
| C9                        | 140.86          | 149.77    | 145.07   | 156.80    | 145.62   |
| C10                       | 134.87          | 143.13    | 130.64   | 141.75    | 130.34   |
| C11                       | 132.43          | 140.29    | 128.91   | 138.64    | 128.85   |
| C12                       | 121.63          | 128.61    | 119.73   | 128.85    | 119.02   |
| C13                       | 140.26          | 147.20    | 147.31   | 154.05    | 147.55   |
| C14                       | 141.11          | 150.13    | 137.34   | 146.31    | 138.02   |
| C15                       | 134.77          | 143.15    | 124.79   | 134.70    | 124.32   |
| C16                       | 137.94          | 146.93    | 127.82   | 139.33    | 127.80   |
| C17                       | 131.59          | 139.48    | 133.24   | 144.31    | 132.46   |
| C18                       | 149.63          | 157.37    | 138.30   | 148.14    | 136.98   |
| C19                       | 139.73          | 146.24    | 148.52   | 158.07    | 148.20   |
| C20                       | 122.16          | 129.21    | 129.43   | 138.03    | 128.76   |
| C21                       | 161.50          | 172.97    | 166.89   | 175.17    | 166.95   |
| C23                       | 161.37          | 172.65    | 166.56   | 176.93    | 166.58   |
| C24                       | 135.41          | 143.61    | 133.51   | 145.22    | 133.80   |
| C25                       | 152.30          | 162.72    | 141.14   | 152.33    | 142.71   |
| C26                       | 132.80          | 138.32    | 130.28   | 139.36    | 130.87   |
| C27                       | 136.89          | 144.77    | 140.86   | 145.15    | 141.88   |
| C28                       | 133.74          | 139.81    | 136.54   | 145.26    | 138.13   |
| C29                       | 129.16          | 135.05    | 127.09   | 139.69    | 127.17   |
| C30                       | 135.75          | 143.32    | 138.11   | 150.82    | 138.43   |
| C32                       | 143.99          | 155.05    | 148.86   | 162.12    | 149.27   |
| G2                        | 140.67          | 149.07    | 136.06   | 149.56    | 136.04   |
| G4                        | 134.16          | 140.69    | 133.53   | 142.31    | 133.26   |
| G5                        | 153.79          | 166.60    | 149.97   | 164.29    | 149.63   |
| G6                        | 129.63          | 137.34    | 126.73   | 137.66    | 126.72   |
| G7                        | 133.98          | 140.91    | 131.23   | 141.77    | 131.64   |
| G8                        | 127.51          | 133.28    | 126.68   | 135.36    | 127.76   |

\* See Fig. 12 of the main article.

Table S 11: Calculated first four and five singlet excited state energies in each of the relevant irreps of perylene up to  $-e(\text{HOMO})$  5.11 eV and acetonitrile *in vacuo*. The magnetically allowed excited states and corresponding irreps at which the magnetic transition dipole moment operates in, are given.

| System          | Perylene         |             | CH <sub>3</sub> CN |                 |             |
|-----------------|------------------|-------------|--------------------|-----------------|-------------|
| Point group     | State            | Energy (eV) | Point group        | State           | Energy (eV) |
| D <sub>2h</sub> | 1B <sub>1g</sub> | 3.69        | C <sub>3v</sub>    | 1A <sub>2</sub> | 7.95        |
|                 | 2B <sub>1g</sub> | 4.03        |                    | 2A <sub>2</sub> | 11.26       |
|                 | 3B <sub>1g</sub> | 4.12        |                    | 3A <sub>2</sub> | 12.23       |
|                 | 4B <sub>1g</sub> | 4.62        |                    | 4A <sub>2</sub> | 14.64       |
|                 | 1B <sub>2g</sub> | 5.79        | 1E                 | 8.25            |             |
|                 | 2B <sub>2g</sub> | 6.44        | 2E                 | 9.29            |             |
|                 | 3B <sub>2g</sub> | 7.27        | 3E                 | 9.42            |             |
|                 | 4B <sub>2g</sub> | 7.60        | 4E                 | 11.33           |             |
|                 | 5B <sub>2g</sub> | 7.62        | 5E                 | 12.22           |             |
|                 | 1B <sub>3g</sub> | 5.77        |                    |                 |             |
|                 | 2B <sub>3g</sub> | 6.46        |                    |                 |             |
|                 | 3B <sub>3g</sub> | 7.61        |                    |                 |             |
|                 | 4B <sub>3g</sub> | 7.63        |                    |                 |             |
|                 | 5B <sub>3g</sub> | 7.93        |                    |                 |             |

Table S 12: The calculated singlet excited state energies up to  $-e(\text{HOMO})$  values 5.51, 5.67 and 5.43 eV of perylene. The perylene molecule was dissolved in acetonitrile in the MD snapshot numbers 103, 457 and 735.

| State | Snapshot number |      |      |
|-------|-----------------|------|------|
|       | 103             | 457  | 735  |
| A1    | 2.62            | 2.46 | 2.56 |
| A2    | 3.56            | 3.38 | 3.48 |
| A3    | 3.86            | 3.58 | 3.67 |
| A4    | 3.94            | 3.72 | 3.83 |
| A5    | 4.03            | 3.98 | 3.93 |
| A6    | 4.19            | 4.01 | 4.02 |
| A7    | 4.39            | 4.32 | 4.07 |
| A8    | 4.47            | 4.36 | 4.21 |
| A9    | 4.48            | 4.69 | 4.32 |
| A10   | 4.73            | 4.85 | 4.36 |
| A11   | 4.81            | 4.95 | 4.37 |
| A12   | 4.97            | 4.96 | 4.43 |
| A13   | 5.12            | 4.98 | 4.56 |
| A14   | 5.23            | 5.00 | 4.62 |
| A15   | 5.25            | 5.09 | 4.68 |
| A16   | 5.28            | 5.17 | 4.70 |
| A17   | 5.31            | 5.20 | 4.74 |
| A18   | 5.33            | 5.24 | 4.87 |
| A19   | 5.36            | 5.25 | 4.88 |
| A20   | 5.40            | 5.27 | 4.94 |
| A21   | 5.41            | 5.29 | 4.99 |
| A22   | 5.43            | 5.29 | 5.03 |
| A23   | 5.44            | 5.33 | 5.04 |
| A24   | 5.46            | 5.35 | 5.15 |
| A25   | 5.47            | 5.39 | 5.15 |
| A26   | 5.48            | 5.41 | 5.22 |
| A27   | 5.51            | 5.42 | 5.25 |
| A28   | -               | 5.47 | 5.26 |
| A29   | -               | 5.47 | 5.31 |
| A30   | -               | 5.49 | 5.33 |
| A31   | -               | 5.52 | 5.35 |
| A32   | -               | 5.54 | 5.40 |
| A33   | -               | 5.55 | 5.43 |
| A34   | -               | 5.58 | 5.43 |
| A35   | -               | 5.59 | -    |
| A36   | -               | 5.60 | -    |
| A37   | -               | 5.62 | -    |
| A38   | -               | 5.63 | -    |
| A39   | -               | 5.64 | -    |
| A40   | -               | 5.67 | -    |
| A41   | -               | 5.67 | -    |
| A42   | -               | -    | -    |

Table S 13: XYZ coordinates of the perylene snapshots 103, 457 and 735.

103

134

C 10.343996 13.304076 2.937743  
 C 10.212652 14.567998 3.166491  
 C 9.183296 15.079359 3.953799  
 C 8.331635 14.183509 4.663478  
 C 8.591151 12.865922 4.591111  
 C 9.620253 12.387462 3.753271  
 C 9.018496 16.436913 4.173561  
 C 8.038981 16.992094 4.963413  
 C 7.148529 16.091385 5.520352  
 C 7.308627 14.725094 5.433372  
 C 7.803821 12.001899 5.366462  
 C 6.744271 12.481566 6.176069  
 C 6.487098 13.886533 6.28135  
 C 7.995658 10.597014 5.271635  
 C 7.327615 9.738151 6.123867  
 C 6.362014 10.196754 6.964258  
 C 6.048182 11.568151 6.988921  
 C 5.055135 12.033624 7.820213  
 C 4.838907 13.385682 7.959556  
 C 5.567928 14.291003 7.255911  
 H 11.041883 12.937104 2.154213  
 H 10.811128 15.271206 2.611541  
 H 9.823648 11.341228 3.587617  
 H 9.731119 17.13747 3.815348  
 H 8.036787 18.094229 5.060575  
 H 6.347365 16.554386 6.100068  
 H 8.727252 10.148416 4.658556  
 H 7.542068 8.675117 6.123105  
 H 5.880305 9.51864 7.551737  
 H 4.487565 11.271161 8.350753  
 H 4.105225 13.761704 8.670495  
 H 5.419284 15.336977 7.411496  
 N 5.877815 17.3892244963 9.373132  
 C 4.843522 17.8632634963 9.419606  
 C 3.554116 18.4111684963 9.515473  
 H 3.632723 19.5270864963 9.365111  
 H 2.98941 17.8271824963 8.777675  
 H 3.077389 18.1393934963 10.496287  
 N 11.161181 11.352696 7.289963  
 C 11.179927 12.444489 6.975836  
 C 11.351716 13.866418 6.674842  
 H 10.551435 14.422042 7.132419  
 H 12.27057 14.093701 7.168747  
 H 11.310433 14.032941 5.634222  
 N 7.49795 9.914169 11.439813  
 C 7.892166 10.50659 10.563367  
 C 8.480301 11.253931 9.471613

H 7.873742 12.110425 9.213592  
 H 9.515787 11.488688 9.593423  
 H 8.546343 10.552282 8.698494  
 N 9.328139 20.2220714963 6.449235  
 C 9.230817 19.4085464963 7.267931  
 C 8.977 18.2981764963 8.162595  
 H 8.733851 17.4392574963 7.484399  
 H 9.890271 17.9911174963 8.651271  
 H 8.228551 18.5150134963 8.874974  
 N 8.752032 4.63945 4.957269  
 C 8.405002 5.078071 5.984347  
 C 7.817941 5.601124 7.245683  
 H 6.735334 5.355962 7.343261  
 H 8.344063 5.17069 8.011974  
 H 7.973019 6.673165 7.156926  
 N 11.771442 20.3006044963 1.176565  
 C 11.075338 20.4798124963 2.074514  
 C 10.175356 20.6685984963 3.263883  
 H 9.304156 21.1893944963 2.891609  
 H 9.941664 19.7133084963 3.688791  
 H 10.753247 21.2964034963 3.97311  
 N 2.652808 15.9388544963 14.585591  
 C 2.73059 15.6494464963 13.474185  
 C 2.899295 15.2537194963 12.088218  
 H 2.002428 15.5022004963 11.563525  
 H 3.733877 15.7791814963 11.644717  
 H 3.22231 14.1723094963 12.019032  
 N 11.58451 9.916203 -1.771686  
 C 12.057681 10.672658 -1.028203  
 C 12.741393 11.528929 -0.078928  
 H 13.61667 11.926054 -0.543813  
 H 12.105145 12.355278 0.214345  
 H 13.044271 10.940853 0.750987  
 N 13.593002 14.306174 2.416659  
 C 14.52344 13.639624 2.638354  
 C 15.685086 12.810344 2.9156  
 H 15.444785 11.827555 2.513309  
 H 16.551958 13.250779 2.406765  
 H 15.955812 12.759924 3.904872  
 N 10.561117 7.227619 6.575247  
 C 10.604536 7.57019 7.653711  
 C 10.510546 7.942345 9.045664  
 H 11.363894 7.657455 9.678347  
 H 10.552575 9.065957 9.024831  
 H 9.701109 7.511295 9.608452  
 N 8.268021 18.0513974963 0.905419  
 C 7.440957 17.3829824963 1.393945  
 C 6.401022 16.6404424963 2.042424  
 H 5.789222 16.3848044963 1.249382  
 H 6.658437 15.7880794963 2.680753  
 H 5.856823 17.3226094963 2.687865  
 N 5.211216 19.9406294963 6.054376  
 C 4.504731 19.1603024963 5.554058  
 C 3.679923 18.0236984963 4.963479  
 H 2.621641 18.2875744963 4.85502  
 H 4.079754 17.8540544963 3.914063



|     |           |               |           |   |            |                |           |
|-----|-----------|---------------|-----------|---|------------|----------------|-----------|
| H   | 3.727134  | 17.1493934963 | 5.571793  | C | -3.166596  | -10.732392     | 3.508487  |
| N   | 2.280365  | 15.755531     | 7.115037  | H | -7.972816  | -16.234123     | 1.499008  |
| C   | 1.880691  | 14.686582     | 7.261438  | H | -5.986888  | -17.130947     | 2.387149  |
| C   | 1.304332  | 13.363009     | 7.518739  | H | -8.293665  | -13.81323      | 1.307161  |
| H   | 1.288932  | 13.092422     | 8.608253  | H | -3.688073  | -16.940865     | 3.098459  |
| H   | 0.2795    | 13.365509     | 7.223755  | H | -1.842615  | -15.537089     | 3.760307  |
| H   | 1.85242   | 12.653913     | 6.881091  | H | -2.04379   | -13.12682      | 3.73382   |
| N   | 9.519547  | 7.856456      | 2.35111   | H | -8.30837   | -11.669518     | 0.934731  |
| C   | 8.429414  | 7.669188      | 2.508854  | H | -8.498206  | -9.410636      | 0.898479  |
| C   | 7.026212  | 7.460591      | 2.785695  | H | -6.610373  | -7.941312      | 1.873447  |
| H   | 6.533998  | 8.21021       | 3.492597  | H | -4.629134  | -7.76726       | 3.013357  |
| H   | 6.41093   | 7.381113      | 1.933263  | H | -2.647149  | -8.83528       | 4.159337  |
| H   | 7.063406  | 6.625181      | 3.452178  | H | -2.234993  | -11.090882     | 4.044008  |
| N   | 3.517269  | 11.41848      | 4.250638  | N | -2.159947  | -10.568065     | 7.455029  |
| C   | 3.574716  | 12.542497     | 4.037503  | C | -1.781609  | -10.843659     | 8.482765  |
| C   | 3.671913  | 14.022683     | 3.810513  | C | -1.325871  | -11.235385     | 9.803871  |
| H   | 4.696079  | 14.356836     | 3.711709  | H | -0.251904  | -11.388431     | 9.739445  |
| H   | 3.186172  | 14.291165     | 2.915617  | H | -1.474743  | -10.38851      | 10.497074 |
| H   | 3.127126  | 14.605399     | 4.604135  | H | -1.819092  | -12.067083     | 10.285595 |
| N   | 11.00519  | 14.8205894963 | -0.331913 | N | -3.536895  | -7.872444      | 8.869287  |
| C   | 11.471809 | 15.7537494963 | 0.050161  | C | -4.219763  | -8.41213       | 8.090435  |
| C   | 11.853048 | 17.0765404963 | 0.498747  | C | -5.009556  | -9.105685      | 7.076768  |
| H   | 10.930672 | 17.5138234963 | 0.833408  | H | -5.209363  | -8.436302      | 6.270236  |
| H   | 12.638962 | 17.0032874963 | 1.250925  | H | -4.541405  | -9.985724      | 6.674711  |
| H   | 12.170034 | 17.5758794963 | -0.407211 | H | -5.929079  | -9.372758      | 7.499858  |
| N   | 5.99788   | 13.4047       | 1.569916  | N | 0.396888   | -13.179873     | 1.425184  |
| C   | 6.39696   | 12.309183     | 1.696419  | C | -0.425545  | -12.399384     | 1.147329  |
| C   | 6.818122  | 10.946772     | 1.865277  | C | -1.387602  | -11.444238     | 0.718145  |
| H   | 7.862355  | 10.800981     | 1.621693  | H | -2.309981  | -11.905161     | 0.902299  |
| H   | 6.507336  | 10.615022     | 2.831303  | H | -1.261953  | -10.556539     | 1.314098  |
| H   | 6.30127   | 10.29191      | 1.157101  | H | -1.321374  | -11.358337     | -0.303917 |
|     |           |               |           | N | -1.090255  | -18.3564616427 | 4.328916  |
| 457 |           |               |           | C | -1.345569  | -19.2887546427 | 4.879923  |
|     |           |               |           | C | -1.684595  | -20.5346636427 | 5.584982  |
|     |           |               |           | H | -0.918554  | -20.6345416427 | 6.35429   |
| 134 |           |               |           | H | -2.667064  | -20.6966316427 | 5.952204  |
|     |           |               |           | H | -1.443334  | -21.3169476427 | 4.882829  |
| C   | -7.246782 | -15.548931    | 1.882538  | N | -10.073547 | -17.9927376427 | 2.896675  |
| C   | -6.079535 | -16.110735    | 2.354117  | C | -9.177452  | -18.7070236427 | 2.739821  |
| C   | -5.021798 | -15.267385    | 2.72016   | C | -8.076172  | -19.5646226427 | 2.47682   |
| C   | -5.101008 | -13.898641    | 2.543061  | H | -8.170387  | -20.0329886427 | 1.510249  |
| C   | -6.273434 | -13.356435    | 2.000879  | H | -7.088418  | -19.1007716427 | 2.439739  |
| C   | -7.32048  | -14.20334     | 1.717125  | H | -8.118717  | -20.2860846427 | 3.253294  |
| C   | -3.844109 | -15.853327    | 3.149082  | N | -10.293106 | -6.006068      | 2.372865  |
| C   | -2.755794 | -15.022153    | 3.512316  | C | -9.694374  | -6.144475      | 1.401388  |
| C   | -2.881486 | -13.649491    | 3.487137  | C | -8.990387  | -6.195294      | 0.166663  |
| C   | -4.006208 | -13.030135    | 2.982296  | H | -7.932408  | -5.893271      | 0.196724  |
| C   | -6.334879 | -11.970702    | 1.879532  | H | -9.06419   | -7.170236      | -0.270021 |
| C   | -5.290902 | -11.07202     | 2.32214   | H | -9.549824  | -5.592717      | -0.513278 |
| C   | -4.131208 | -11.610235    | 2.924733  | N | -8.007023  | -13.4502       | 5.957328  |
| C   | -7.443559 | -11.250821    | 1.328206  | C | -8.420738  | -12.61771      | 5.288393  |
| C   | -7.5938   | -9.84313      | 1.262854  | C | -8.977818  | -11.532384     | 4.438488  |
| C   | -6.558999 | -9.021121     | 1.792247  | H | -8.117321  | -10.817369     | 4.405204  |
| C   | -5.44125  | -9.682987     | 2.315585  | H | -9.225136  | -12.003285     | 3.487653  |
| C   | -4.469893 | -8.831131     | 2.914825  | H | -9.864361  | -11.105636     | 4.820417  |
| C   | -3.400113 | -9.350025     | 3.652041  | N | -6.587184  | -7.627         | -1.850999 |

|   |            |                |           |     |           |            |               |
|---|------------|----------------|-----------|-----|-----------|------------|---------------|
| C | -6.202449  | -8.669819      | -1.670909 | H   | -0.399372 | -8.424894  | 6.932509      |
| C | -5.645625  | -9.988186      | -1.516693 | H   | -1.084459 | -7.463624  | 5.539114      |
| H | -5.224192  | -10.0194       | -0.463598 | H   | 0.015295  | -8.661321  | 5.151874      |
| H | -6.463911  | -10.720047     | -1.538427 |     |           |            |               |
| H | -4.950503  | -9.957584      | -2.328605 | 735 |           |            |               |
| N | 2.139222   | -17.5802066427 | 5.260287  |     |           |            |               |
| C | 1.733856   | -16.8153106427 | 4.484704  |     |           |            |               |
| C | 1.328669   | -15.8678046427 | 3.452783  | 158 |           |            |               |
| H | 2.172491   | -15.5866306427 | 2.766795  |     |           |            |               |
| H | 0.396614   | -16.1461076427 | 2.932554  | C   | -0.020592 | -10.631819 | 10.717229     |
| H | 1.214716   | -14.9122096427 | 3.988627  | C   | -1.172596 | -9.839223  | 10.737822     |
| N | -3.279274  | -15.729124     | 6.923087  | C   | -1.651181 | -9.343647  | 11.9766       |
| C | -3.831469  | -14.769868     | 6.686179  | C   | -0.944548 | -9.699181  | 13.180764     |
| C | -4.542402  | -13.56132      | 6.429094  | C   | 0.262259  | -10.478622 | 13.131657     |
| H | -3.771528  | -12.795853     | 6.181179  | C   | 0.637815  | -10.97363  | 11.895062     |
| H | -5.151582  | -13.71383      | 5.567168  | C   | -2.774909 | -8.490226  | 11.963669     |
| H | -5.128141  | -13.184251     | 7.268765  | C   | -3.333998 | -8.214478  | 13.181442     |
| N | -11.565126 | -19.8456496427 | 0.181621  | C   | -2.65477  | -8.455313  | 14.377051     |
| C | -11.670729 | -18.6935296427 | 0.195426  | C   | -1.444979 | -9.182053  | 14.379019     |
| C | -11.895643 | -17.2657166427 | 0.176726  | C   | 0.899399  | -10.794235 | 14.346173     |
| H | -12.212616 | -16.8995056427 | -0.828774 | C   | 0.374733  | -10.350632 | 15.597132     |
| H | -12.759642 | -16.9976606427 | 0.916198  | C   | -0.809805 | -9.563403  | 15.596362     |
| H | -11.131884 | -16.6909426427 | 0.648604  | C   | 2.04292   | -11.568518 | 14.333689     |
| N | -5.073002  | -19.2329676427 | 5.167594  | C   | 2.592436  | -12.017024 | 15.537622     |
| C | -5.648044  | -18.3372576427 | 5.541296  | C   | 2.129484  | -11.556881 | 16.75256      |
| C | -6.365276  | -17.1252556427 | 6.008663  | C   | 1.016642  | -10.716778 | 16.787973     |
| H | -6.909062  | -16.9001656427 | 5.129869  | C   | 0.636803  | -10.203467 | 18.009388     |
| H | -7.126145  | -17.4077456427 | 6.687519  | C   | -0.576483 | -9.524118  | 18.051804     |
| H | -5.802882  | -16.3060266427 | 6.335229  | C   | -1.270474 | -9.207     | 16.892931     |
| N | -3.678688  | -12.328064     | -1.495255 | H   | 0.322591  | -11.090655 | 9.7544        |
| C | -4.494363  | -13.162531     | -1.454281 | H   | -1.653521 | -9.657504  | 9.833614      |
| C | -5.432276  | -14.229486     | -1.453328 | H   | 1.48112   | -11.664765 | 11.708273     |
| H | -6.496328  | -13.83159      | -1.291268 | H   | -3.13852  | -8.06814   | 11.057986     |
| H | -5.46669   | -14.569242     | -2.497502 | H   | -4.275989 | -7.666437  | 13.262621     |
| H | -5.085959  | -15.023397     | -0.74804  | H   | -3.138484 | -8.091989  | 15.323511     |
| N | -5.396358  | -19.3348246427 | 0.301329  | H   | 2.401895  | -11.888516 | 13.422265     |
| C | -4.38834   | -18.8081296427 | 0.370944  | H   | 3.49172   | -12.602474 | 15.455609     |
| C | -3.08271   | -18.1290986427 | 0.340618  | H   | 2.612145  | -11.85673  | 17.683056     |
| H | -3.100513  | -17.0716266427 | 0.627247  | H   | 1.121364  | -10.42696  | 18.919252     |
| H | -2.523292  | -18.5444596427 | 1.170286  | H   | -1.020985 | -9.113021  | 18.960005     |
| H | -2.485826  | -18.3030126427 | -0.583809 | H   | -2.122615 | -8.520808  | 17.048128     |
| N | -0.653079  | -13.16308      | 5.929301  | N   | 2.960595  | -8.21514   | 12.956483     |
| C | -0.260037  | -13.978599     | 6.665009  | C   | 3.136776  | -8.204881  | 14.152371     |
| C | 0.135124   | -15.038157     | 7.581958  | C   | 3.363801  | -8.142365  | 15.567178     |
| H | 0.2406     | -14.70189      | 8.587989  | H   | 4.319706  | -8.645543  | 15.701612     |
| H | -0.524119  | -15.884404     | 7.483578  | H   | 3.443993  | -7.118648  | 15.939126     |
| H | 1.130104   | -15.329967     | 7.259074  | H   | 2.4567    | -8.566129  | 16.046741     |
| N | -2.887437  | -4.383355      | 3.860056  | N   | -6.588937 | -3.402148  | 15.7338970684 |
| C | -3.525556  | -4.566651      | 2.949357  | C   | -6.277061 | -4.47944   | 15.8616130684 |
| C | -4.429616  | -4.737561      | 1.849352  | C   | -5.915754 | -5.893047  | 15.8887390684 |
| H | -3.886707  | -4.671029      | 0.909515  | H   | -6.174415 | -6.376744  | 14.9004350684 |
| H | -4.892929  | -5.740036      | 1.89116   | H   | -4.851964 | -6.012995  | 16.1918700684 |
| H | -5.214017  | -3.987286      | 1.885568  | H   | -6.67896  | -6.360414  | 16.5549680684 |
| N | 1.596474   | -6.153798      | 6.089263  | N   | -1.657212 | -2.301257  | 13.843331     |
| C | 0.779414   | -7.002107      | 6.079813  | C   | -2.318181 | -3.194274  | 13.847616     |
| C | -0.248214  | -7.960279      | 5.959099  | C   | -3.142361 | -4.369608  | 13.914269     |

|   |           |            |               |   |           |                |               |
|---|-----------|------------|---------------|---|-----------|----------------|---------------|
| H | -4.254296 | -4.11854   | 13.857413     | H | 5.025712  | -13.673898     | 17.2892370684 |
| H | -2.854744 | -5.115728  | 13.14741      | N | 2.658649  | -16.3777340684 | 16.819357     |
| H | -2.913113 | -4.760115  | 14.862672     | C | 2.391367  | -15.8901890684 | 15.825623     |
| N | -1.480179 | -9.175455  | 22.8496460684 | C | 2.016605  | -15.3188080684 | 14.502037     |
| C | -0.583305 | -8.630037  | 22.3955600684 | H | 1.487882  | -16.0885570684 | 13.838194     |
| C | 0.533545  | -7.886909  | 21.8737890684 | H | 1.320562  | -14.5067970684 | 14.701227     |
| H | 1.055052  | -7.408872  | 22.6790890684 | H | 2.909089  | -14.9047840684 | 13.974544     |
| H | 1.165492  | -8.580946  | 21.4872100684 | N | -0.102212 | -9.283545      | 5.766723      |
| H | 0.181825  | -7.192535  | 21.1240940684 | C | -0.51415  | -8.318233      | 6.18967       |
| N | 4.480099  | -12.672107 | 12.410844     | C | -1.043674 | -7.079229      | 6.705497      |
| C | 5.052308  | -11.716611 | 12.578572     | H | -1.307798 | -6.5079        | 5.840411      |
| C | 5.87362   | -10.521733 | 12.675313     | H | -1.925434 | -7.165672      | 7.440925      |
| H | 6.564801  | -10.641814 | 13.440167     | H | -0.243808 | -6.503913      | 7.227427      |
| H | 6.412583  | -10.389419 | 11.748078     | N | -5.951957 | -8.933518      | 15.7853100684 |
| H | 5.290757  | -9.588918  | 12.960687     | C | -6.281417 | -9.571445      | 16.6767100684 |
| N | -1.194133 | -14.134439 | 16.0992570684 | C | -6.630313 | -10.2226       | 17.9186280684 |
| C | -1.308118 | -13.669173 | 17.1474800684 | H | -7.184291 | -11.122052     | 17.8118870684 |
| C | -1.36226  | -13.060035 | 18.4600790684 | H | -5.710464 | -10.444785     | 18.3806260684 |
| H | -0.391166 | -12.933436 | 18.8445450684 | H | -7.30786  | -9.654805      | 18.4746150684 |
| H | -1.914808 | -12.103045 | 18.6005630684 | N | 3.898139  | -7.934069      | 20.2888260684 |
| H | -2.047298 | -13.743066 | 19.0459830684 | C | 4.397462  | -8.97182       | 20.3079500684 |
| N | -3.525054 | -15.337591 | 13.086691     | C | 5.001143  | -10.287339     | 20.4469930684 |
| C | -2.658934 | -15.002339 | 12.362625     | H | 5.935131  | -10.132138     | 21.0013900684 |
| C | -1.518693 | -14.605563 | 11.56634      | H | 4.389403  | -10.904718     | 21.0356970684 |
| H | -1.72849  | -13.912364 | 10.765425     | H | 5.147696  | -10.730988     | 19.4894850684 |
| H | -0.793444 | -14.123351 | 12.167141     | N | 3.21454   | -11.263818     | 8.828861      |
| H | -1.096794 | -15.585178 | 11.320465     | C | 3.047654  | -10.16612      | 9.159561      |
| N | -0.935999 | -14.267419 | 21.6467220684 | C | 2.971742  | -8.745044      | 9.544508      |
| C | 0.123903  | -13.822417 | 21.8018000684 | H | 3.969735  | -8.327403      | 9.583452      |
| C | 1.421113  | -13.312858 | 22.1380490684 | H | 2.45609   | -8.253583      | 8.736239      |
| H | 2.070125  | -14.161496 | 22.1744830684 | H | 2.647012  | -8.677899      | 10.560412     |
| H | 1.878911  | -12.604686 | 21.3814180684 | N | -4.352244 | -10.130494     | 9.119203      |
| H | 1.203121  | -12.882531 | 23.1665530684 | C | -4.547297 | -10.736546     | 10.087952     |
| N | -3.546724 | -5.169251  | 9.613185      | C | -4.863566 | -11.452201     | 11.293827     |
| C | -3.722967 | -4.348259  | 8.868175      | H | -5.687976 | -10.923024     | 11.844093     |
| C | -3.9029   | -3.269009  | 7.93418       | H | -5.076079 | -12.528961     | 11.038324     |
| H | -3.662405 | -3.790082  | 7.003226      | H | -4.04106  | -11.495039     | 11.915409     |
| H | -4.883335 | -2.718194  | 7.887265      | N | -5.45665  | -13.067485     | 16.621452     |
| H | -3.20572  | -2.496651  | 8.190821      | C | -4.769196 | -12.653758     | 15.821101     |
| N | 0.007383  | -5.595697  | 15.4381680684 | C | -4.020894 | -11.983878     | 14.790559     |
| C | 0.25782   | -5.753661  | 16.5906070684 | H | -3.661274 | -12.82615      | 14.224202     |
| C | 0.473262  | -5.941821  | 18.0155380684 | H | -4.522091 | -11.191379     | 14.284904     |
| H | 1.290452  | -5.255001  | 18.3101540684 | H | -3.12259  | -11.682216     | 15.372642     |
| H | -0.466452 | -5.704124  | 18.5667800684 | N | 6.013059  | -11.027743     | 15.9910490684 |
| H | 0.675247  | -6.968077  | 18.2717370684 | C | 6.593627  | -10.250625     | 16.6312950684 |
| N | 0.860238  | -6.263639  | 9.527961      | C | 7.378992  | -9.307971      | 17.3513030684 |
| C | 0.691321  | -6.167089  | 10.692719     | H | 6.803066  | -8.510154      | 17.9148410684 |
| C | 0.664338  | -6.106901  | 12.156817     | H | 7.952407  | -9.870158      | 18.0667770684 |
| H | 0.005234  | -5.244728  | 12.341979     | H | 8.111627  | -8.923297      | 16.6349280684 |
| H | 0.099328  | -6.965877  | 12.51517      | N | -3.560973 | -12.814044     | 4.966261      |
| H | 1.651528  | -5.944192  | 12.683917     | C | -2.887074 | -12.562257     | 5.891342      |
| N | 3.078064  | -13.976945 | 19.6377610684 | C | -2.225137 | -12.115289     | 7.055851      |
| C | 4.128227  | -13.95717  | 19.0788200684 | H | -2.788697 | -12.364362     | 7.919034      |
| C | 5.328372  | -13.907205 | 18.3061720684 | H | -1.152547 | -12.469175     | 7.061571      |
| H | 6.029748  | -13.321374 | 18.8770440684 | H | -2.297807 | -11.010829     | 6.85099       |
| H | 5.688823  | -14.896611 | 18.4538380684 |   |           |                |               |
